# Supplementary material for: Antigen-based diagnosis of Schistosoma infection in travellers: a prospective study
Source: PubMed Central journal article supplement — J Travel Med. 2020 Apr 18;27(4):taaa055. doi: 10.1093/jtm/taaa055 (PMC7359925; doi:10.1093/jtm/taaa055), 2020-04-18
Supplement: supplementary_data_taaa055.pdf [file supplementary_data_taaa055.pdf]

## 1 SUPPLEMENTARY MATERIAL

**A**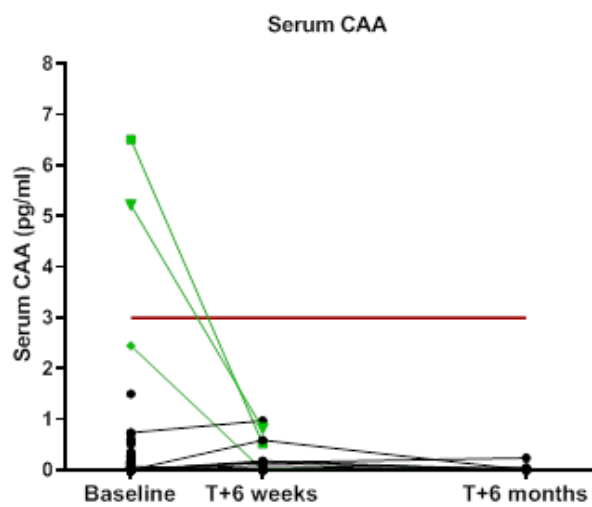**B**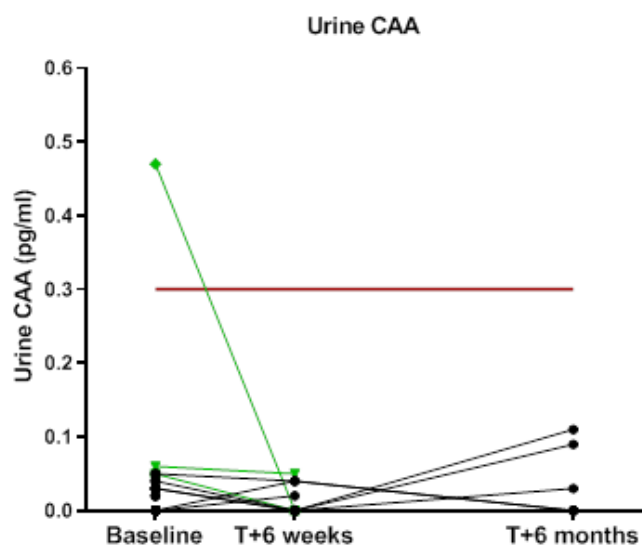

3 **Figure 1.** (Panel A) CAA concentrations in serum samples in pg/ml over time points. Red  
4 line indicates the UCP-CAA LF threshold value used for serum (3 pg CAA/ml). (Panel B)  
5 CAA concentrations in urine samples in pg/ml over time points. Red line indicates the UCP-  
6 CAA LF threshold value used for urine (0.3 pg CAA/ml).  
7 Individuals who are positive for any of the UCP-LF CAA assays are depicted in green, while  
8 the completely negative individuals are represented by black lines.

9 **Table 1.** Comparison of positives over time based on antigen (CAA) or antibody (Ab)  
 10 diagnostic detection.

|      | Baseline    |       |             |               | 6 weeks after Treatment |       |             |               | 6 months after Treatment |       |             |               |
|------|-------------|-------|-------------|---------------|-------------------------|-------|-------------|---------------|--------------------------|-------|-------------|---------------|
|      | CAA (pg/ml) |       | Ab          |               | CAA (pg/ml)             |       | Ab          |               | CAA (pg/ml)              |       | Ab          |               |
|      | Urine       | Serum | AWA-<br>IFA | SEA-<br>ELISA | Urine                   | Serum | AWA-<br>IFA | SEA-<br>ELISA | Urine                    | Serum | AWA-<br>IFA | SEA-<br>ELISA |
| ID1  | Neg         | Neg   | 512         | Neg           | Neg                     | Neg   | 128         | 1024          | Lf                       | Lf    | Lf          | Lf            |
| ID2  | Neg         | Neg   | 128         | Neg           | Neg                     | Neg   | 32          | 32            | Lf                       | Lf    | Lf          | Lf            |
| ID3  | Neg         | 6,51  | 512         | 512           | Neg                     | 0,52  | 1024        | 512           | Lf                       | Lf    | Lf          | Lf            |
| ID4  | Neg         | 5,22  | 1024        | 32            | 0,05                    | 0,82  | 1024        | 32            | Lf                       | Lf    | Lf          | Lf            |
| ID5  | Neg         | Neg   | 512         | Neg           | Lf                      | Lf    | Lf          | Lf            | Lf                       | Lf    | 512         | 32            |
| ID6  | Neg         | Neg   | 512         | Neg           | Neg                     | Neg   | 1024        | 256           | 0,11                     | Neg   | 64          | 128           |
| ID7  | Neg         | Neg   | 1024        | 1024          | Lf                      | Lf    | 1024        | 1024          | Lf                       | Lf    | Lf          | Lf            |
| ID8  | Neg         | Neg   | 128         | Neg           | 0,04                    | 0,15  | 128         | Neg           | Neg                      | Neg   | 128         | Neg           |
| ID9  | Neg         | Neg   | 2048        | 1024          | Lf                      | 0,18  | 1024        | 512           | Neg                      | Neg   | 256         | 128           |
| ID10 | Neg         | Neg   | 32          | Neg           | Lf                      | Lf    | Lf          | Lf            | Lf                       | Lf    | Lf          | Lf            |
| ID11 | Neg         | Neg   | 256         | Neg           | Lf                      | Lf    | Lf          | Lf            | Lf                       | Lf    | Lf          | Lf            |
| ID12 | Neg         | Neg   | 256         | Neg           | Lf                      | Lf    | Lf          | Lf            | Lf                       | Lf    | Lf          | 32            |
| ID13 | Neg         | Neg   | 1024        | Neg           | Neg                     | 0,59  | 512         | Neg           | Neg                      | Neg   | 128         | Neg           |
| ID14 | Neg         | Neg   | 1024        | Neg           | 0,02                    | 0,97  | 1024        | 32            | Lf                       | Lf    | Lf          | Lf            |
| ID15 | Neg         | Neg   | 256         | Neg           | Lf                      | Lf    | Lf          | Lf            | Lf                       | Lf    | Lf          | Lf            |
| ID16 | Neg         | Neg   | 512         | 128           | Lf                      | Lf    | Lf          | Lf            | Lf                       | Lf    | Lf          | Lf            |
| ID17 | Neg         | Neg   | 1024        | 256           | Neg                     | Neg   | 512         | 256           | Lf                       | Lf    | Lf          | Lf            |
| ID18 | Neg         | Neg   | 512         | 32            | Neg                     | Neg   | 512         | 64            | 0,03                     | 0,05  | 512         | 32            |
| ID19 | Neg         | Neg   | 64          | Neg           | 0,04                    | 0,08  | 128         | Neg           | Neg                      | Neg   | 32          | Neg           |
| ID20 | Neg         | Neg   | 512         | Neg           | Neg                     | 0,15  | >1024       | 64            | 0,09                     | 0,24  | 128         | 64            |
| ID21 | 0,47        | Neg   | 256         | 512           | Neg                     | Neg   | 256         | 512           | Lf                       | 0,03  | Lf          | Lf            |

|      |     |     |     |    |    |    |    |    |    |    |    |    |
|------|-----|-----|-----|----|----|----|----|----|----|----|----|----|
| ID22 | Neg | Neg | Neg | 64 | Lf |
|------|-----|-----|-----|----|----|----|----|----|----|----|----|----|

Neg: Negative; Lf: lost follow-up/ not enough sample to test.
